# Supplementary material
Source: Springer Nature journal article supplement (https://www.springermedizin.de/resource/supplementary/13256_2007_283_MOESM1_ESM.pdf/9646422)

**A**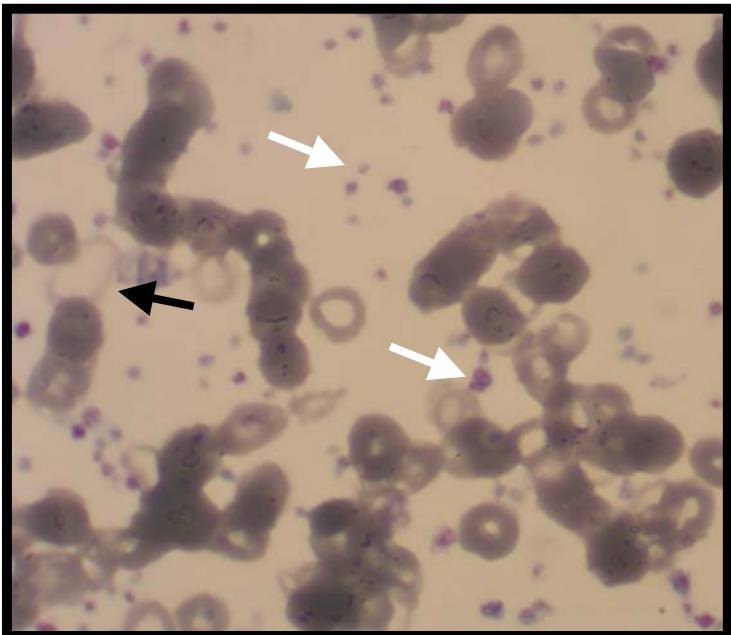**B**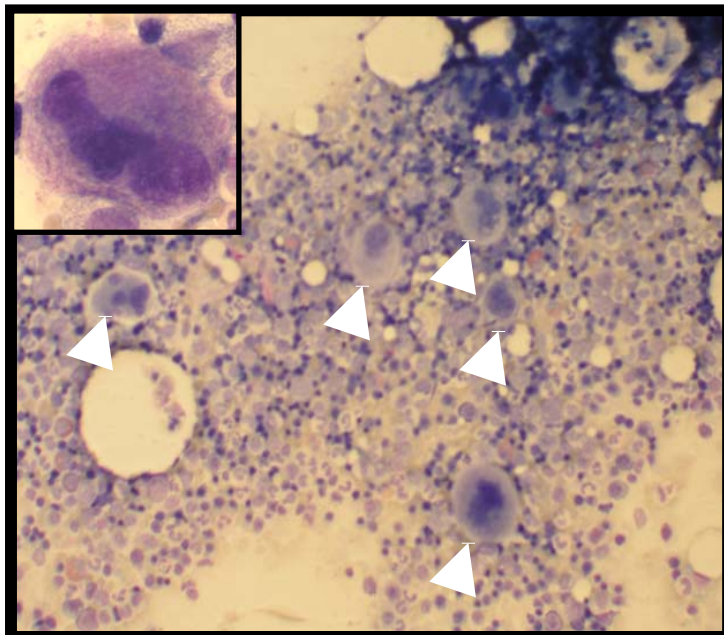

Supplement: MOESM1 [file 9646422]
